# Supplementary material
Source: Springer Nature journal article supplement (https://www.springermedizin.de/resource/supplementary/12930_2012_53_MOESM1_ESM.pdf/9424642)

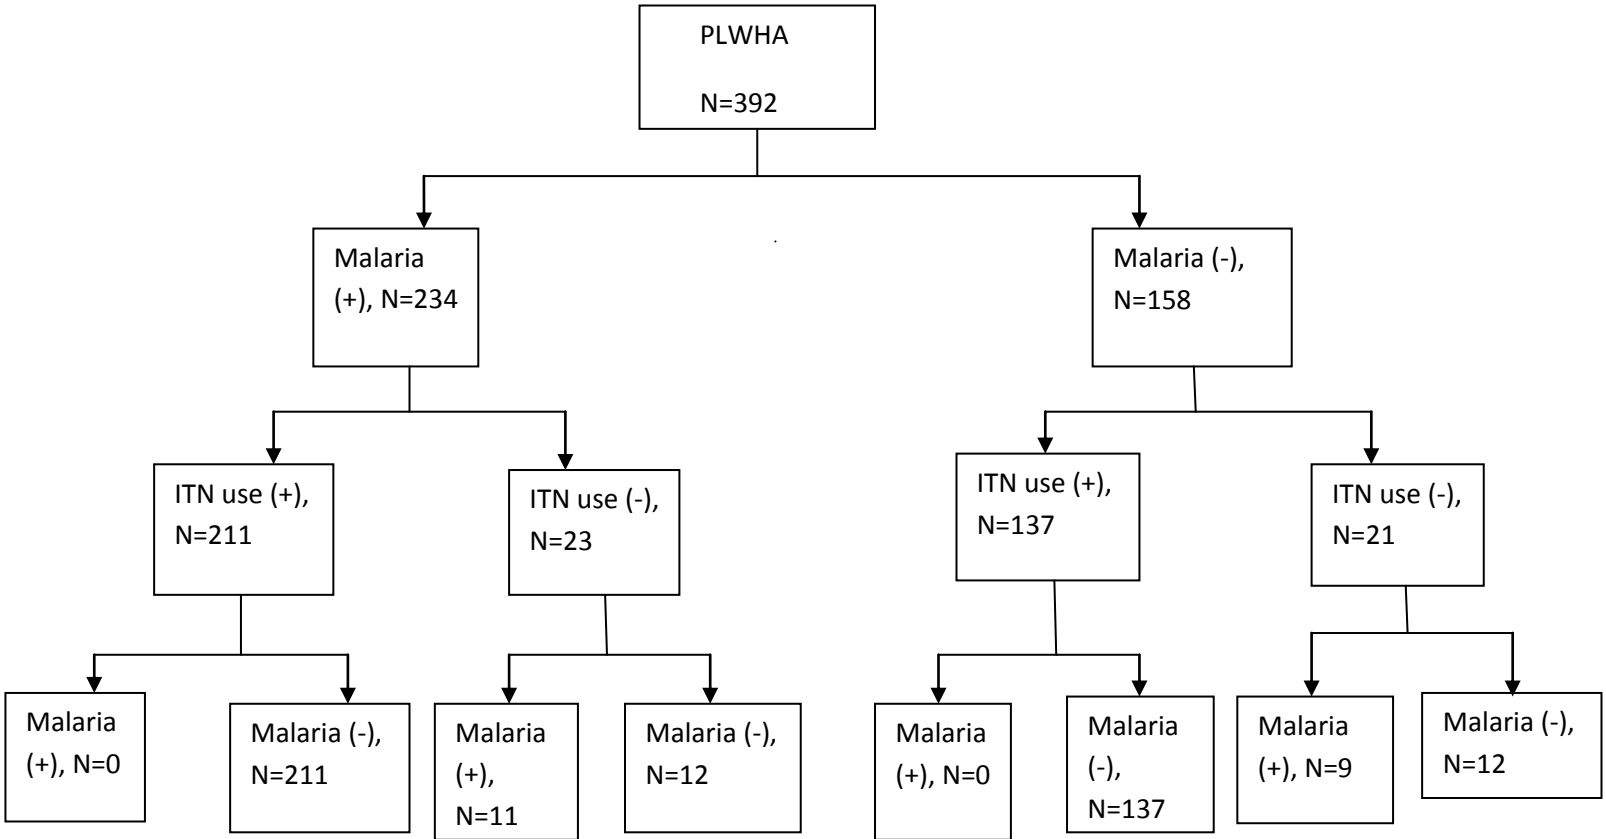

Supplement: MOESM1 [file 9424642]
